# Supplementary material for: Unravelling ‘low-resource settings’: a systematic scoping review with qualitative content analysis
Source: PubMed Central journal article supplement — BMJ Glob Health. 2021 Jun 3;6(6):e005190. doi: 10.1136/bmjgh-2021-005190 (PMC8183220; doi:10.1136/bmjgh-2021-005190), 2021-06-03
Supplement: bmjgh-2021-005190supp001.pdf [file bmjgh-2021-005190supp001.pdf]

## Search strategy of data bases searched

**PUBMED**

Limits applied to database: 2014 - 2019

Language: English

**Search Terms**

```
((("low-resource"[Title/Abstract] OR "low resource"[Title/Abstract] OR "resource-limited"[Title/Abstract] OR "resource* limited"[Title/Abstract] OR "resource poor"[Title/Abstract] OR "resource-poor"[Title/Abstract] OR "resource* constrain"[Title/Abstract] OR "resource restrict"[Title/Abstract] OR "resource-restrict"[Title/Abstract])) OR ((("low-resource"[Text Word] OR "low resource"[Text Word] OR "resource-limited"[Text Word] OR "resource* limited"[Text Word] OR "resource poor"[Text Word] OR "resource-poor"[Text Word] OR "resource* constrain"[Text Word] OR "resource restrict"[Text Word] OR "resource-restrict"[Text Word]))) AND rehabilitation[MeSH])
```

**SCOPUS**

Limits applied to database: 2014 – 2019

Searches in abstract, title or keywords

Language: English

**Search Terms**

```
(rehabilitation) AND ("low-resource" OR "low resource" OR "resource-limited" OR "resource* limited" OR "resource poor" OR "resource-poor" OR "resource* constrain" OR "resource restrict" OR "resource-restrict" )
```

## WEB OF SCIENCE

Limits applied to database: 2014 – 2019

Searches in topics from all databases for “low resource” OR searches in titles from all databases for “low resource” AND searches in research area from all databases for rehabilitation

Language: English

### Search Terms

("low-resource\*" OR "low resource\*" OR "resource-limited" OR "resource\* limited" OR "resource poor" OR "resource-poor" OR "resource\* constrain\*" OR "resource restrict\*" OR "resource-restrict\*") OR ("low-resource\*" OR "low resource\*" OR "resource-limited" OR "resource\* limited" OR "resource poor" OR "resource-poor" OR "resource\* constrain\*" OR "resource restrict\*" OR "resource-restrict\*")) AND SU=rehabilitation)

## AFRICA WIDE

Limits applied to database: 2014 – 2019

Language: English

### Search Terms

TI ( ("low-resource\*" OR "low resource\*" OR "resource-limited" OR "resource\* limited" OR "resource poor" OR "resource-poor" OR "resource\* constrain\*" OR "resource restrict\*" OR "resource-restrict\*") ) OR AB ( ("low-resource\*" OR "low resource\*" OR "resource-limited" OR "resource\* limited" OR "resource poor" OR "resource-poor" OR "resource\* constrain\*" OR "resource restrict\*" OR "resource-restrict\*") ) AND SM rehabilitation
