# Supplementary material for: Unravelling ‘low-resource settings’: a systematic scoping review with qualitative content analysis
Source: PubMed Central journal article supplement — BMJ Glob Health. 2021 Jun 3;6(6):e005190. doi: 10.1136/bmjgh-2021-005190 (PMC8183220; doi:10.1136/bmjgh-2021-005190), 2021-06-03
Supplement: bmjgh-2021-005190supp003.pdf [file bmjgh-2021-005190supp003.pdf]

## DESCRIPTION OF THE INCLUDED ARTICLES

COPD, Chronic Obstructive Pulmonary Disease; HIV, Human Immunodeficiency Virus; OCD, Obsessive Compulsive Disorder; RCT, Randomized Clinical Trial; USA, United States of America.

| Authors                         | Year | Methodological design | Disease Profile                  | Global Health Data Exchange Grouping | Geographic Location | World Bank Income Group in study year | GINI index (most recent) | Brief rehabilitation intervention description                                                                                                                                                             |
|---------------------------------|------|-----------------------|----------------------------------|--------------------------------------|---------------------|---------------------------------------|--------------------------|-----------------------------------------------------------------------------------------------------------------------------------------------------------------------------------------------------------|
| <b>Aikens et al</b><br>(29)     | 2015 | Non-RCT               | Depression                       | B.6.2                                | USA                 | High income                           | 41,4                     | Patient-selected support person integrated into mobile health services for depression                                                                                                                     |
| <b>Baruah et al</b><br>(30)     | 2018 | RCT                   | OCD                              | B.6.4                                | India               | Lower middle income                   | 37,8                     | Brief (6 session) family-based including psychoeducation, exposure and response prevention and family intervention for obsessive compulsive disorder                                                      |
| <b>Bhattacharyya et al</b> 327) | 2018 | Observational cohort  | COPD                             | B.3.1                                | India               | Lower middle income                   | 37,8                     | Curriculum-based intensive single-session intervention with education, bronchial hygiene and exercise training for Chronic Obstructive Pulmonary Disease patients stabilised with uniform pharmacotherapy |
| <b>Boivin et al</b><br>(31)     | 2016 | RCT                   | HIV - neurocognitive impairments | A.1.1.4                              | Uganda              | Low income                            | 42,8                     | 24 one hour sessions of computerised cognitive rehabilitation training in stage 1 or 2 HIV disease.                                                                                                       |
| <b>Burner et al</b><br>(33)     | 2014 | Qualitative           | Diabetes                         | B.8.1                                | USA                 | High income                           | 41,4                     | TExT-MED (mobile health intervention) experiences in low-income Latinos with diabetes                                                                                                                     |

| Authors                            | Year | Methodological design | Disease Profile         | Global Health Data Exchange Grouping | Geographic Location | World Bank Income Group in study year | GINI index (most recent) | Brief rehabilitation intervention description                                                                                                                |
|------------------------------------|------|-----------------------|-------------------------|--------------------------------------|---------------------|---------------------------------------|--------------------------|--------------------------------------------------------------------------------------------------------------------------------------------------------------|
| <b>Caagbay et al</b> (34)          | 2017 | Qualitative           | Pelvic organ prolapse   | B.12.3.5                             | Nepal               | Low income                            | 32,8                     | Brief verbal instruction and illustrative leaflet on how to contract pelvic floor muscles to improve knowledge and muscle contraction in parous women        |
| <b>Cobbing et al</b> (35)          | 2019 | Qualitative           | People living with HIV  | A.1.1.4                              | South Africa        | Upper middle income                   | 63                       | Experiences and reflections of people living with HIV involved in a novel home-based rehabilitation intervention                                             |
| <b>Dambi &amp; Jelsma</b> (36)     | 2014 | Observational cohort  | Cerebral Palsy          | B.5.7                                | Zimbabwe            | Low income                            | 44,3                     | Cerebral palsy rehabilitation services in a community setting and outpatient at a central hospital setting.                                                  |
| <b>Debussche et al</b> (37)        | 2018 | RCT                   | Diabetes Type 2         | B.8.1.2                              | Mali                | Low income                            | 33                       | One year of culturally tailored structured patient education delivered in the community by trained peer educators (peer-led) to adults with type 2 diabetes. |
| <b>Essien et al</b> (38)           | 2017 | RCT                   | Diabetes Type 1 and 2   | B.8.1                                | Nigeria             | Lower middle income                   | 43                       | Intensive and systematic diabetes self-management education, using structured guidelines.                                                                    |
| <b>Ferreira-Correia et al</b> (39) | 2018 | Qualitative           | Working memory deficits | B.6.10                               | South Africa        | Upper middle income                   | 63                       | Evaluation of the barriers encountered by participants in a computer-based rehabilitation program (CBRP).                                                    |

| Authors                           | Year | Methodological design | Disease Profile                          | Global Health Data Exchange Grouping | Geographic Location | World Bank Income Group in study year | GINI index (most recent) | Brief rehabilitation intervention description                                                                                                                                                                              |
|-----------------------------------|------|-----------------------|------------------------------------------|--------------------------------------|---------------------|---------------------------------------|--------------------------|----------------------------------------------------------------------------------------------------------------------------------------------------------------------------------------------------------------------------|
| <b>Flood et al</b><br>(40)        | 2017 | Observational cohort  | Diabetes Type 2                          | B.8.1.2                              | Guatemala           | Upper middle income                   | 48,3                     | Diabetes self-managed education which consisted of 6 home visits conducted by a diabetes educator using a curriculum culturally and linguistically tailored to rural Mayan populations.                                    |
| <b>Foley &amp; Masingila</b> (42) | 2015 | Mixed-Methods         | Visual impairments                       | B.10.1                               | Kenya               | Lower middle income                   | 40,8                     | Design-based research project in which a theoretically-grounded intervention was developed and refined – a model for developing communities of practice to support the use of mobile technology as an assistive technology |
| <b>Foley et al</b><br>(41)        | 2016 | RCT                   | Obesity                                  | No category                          | USA                 | High income                           | 41,4                     | 12-month digital weight loss intervention in a community health centre system                                                                                                                                              |
| <b>Giordani et al</b><br>(43)     | 2015 | Case-Control          | HIV - working memory/attention deficits: | A.1.1.4                              | Uganda              | Low income                            | 42,8                     | Brain Powered Games for cognitive training and rehabilitation of 45minutes, several times a week, for two months (24 sessions) , for at-risk African children                                                              |
| <b>Haddad et al</b><br>(44)       | 2014 | Observational cohort  | Diabetes Type 2                          | B.8.1.2                              | Iraq                | Upper middle income                   | 29,5                     | Weekly SMSs (text messaging) to support education and self-management of Type 2 diabetes over 29 weeks.                                                                                                                    |

| <b>Authors</b>                  | <b>Year</b> | <b>Methodological design</b> | <b>Disease Profile</b>           | <b>Global Health Data Exchange Grouping</b> | <b>Geographic Location</b> | <b>World Bank Income Group in study year</b> | <b>GINI index (most recent)</b> | <b>Brief rehabilitation intervention description</b>                                                                                                                      |
|---------------------------------|-------------|------------------------------|----------------------------------|---------------------------------------------|----------------------------|----------------------------------------------|---------------------------------|---------------------------------------------------------------------------------------------------------------------------------------------------------------------------|
| <b>Hamid et al</b><br>(45)      | 2017        | Cross-sectional study        | Physical disabilities            | No category                                 | Uganda                     | Low income                                   | 42,8                            | Description of disability characteristics of community-based rehabilitation accessed through community-based organisations                                                |
| <b>Hasan et al</b><br>(46)      | 2015        | RCT                          | Schizophrenia                    | B.6.1                                       | Jordan                     | Upper middle income                          | 33,7                            | 12 weeks of a booklet form of psycho-educational, with follow-up phone calls and treatment as usual for people diagnosed with schizophrenia and their primary care-givers |
| <b>Ibrahim et al</b><br>(47)    | 2018        | RCT                          | Low Back Pain                    | B.11.3                                      | Nigeria                    | Lower middle income                          | 43                              | Motor control exercise and patient education program for low resource rural community dwelling adults with chronic low back pain                                          |
| <b>Järnhammer et al</b><br>(48) | 2018        | Qualitative                  | Persons with disabilities        | No category                                 | Nepal                      | Low income                                   | 32,8                            | Experiences of people using lower-limb prostheses in Nepal                                                                                                                |
| <b>Johnson et al</b><br>(49)    | 2014        | RCT                          | Stroke                           | B.2.3                                       | Mexico                     | Upper middle income                          | 45,4                            | Theradrive system in a robot gym (circuit training system with 6 stations) for upper limb stroke rehabilitation                                                           |
| <b>Jones et al</b><br>(50)      | 2017        | Observational cohort         | Post tuberculosis lung disorders | A.2.1                                       | Uganda                     | Low income                                   | 42,8                            | A culturally appropriate, 6-week, twice weekly, pulmonary rehabilitation program in Uganda for people with post-tuberculosis lung disorder.                               |

| Authors                     | Year | Methodological design | Disease Profile                                        | Global Health Data Exchange Grouping | Geographic Location | World Bank Income Group in study year | GINI index (most recent) | Brief rehabilitation intervention description                                                                                                                                                                                             |
|-----------------------------|------|-----------------------|--------------------------------------------------------|--------------------------------------|---------------------|---------------------------------------|--------------------------|-------------------------------------------------------------------------------------------------------------------------------------------------------------------------------------------------------------------------------------------|
| <b>Khabbache et al</b> (51) | 2017 | Qualitative           | Mental, neurological and substance use (MNS) disorders | B.5; B.6                             | Morocco             | Lower middle income                   | 39,5                     | Evaluations of the reactions and feelings of the patients receiving rehabilitation at a mental rehabilitation centre                                                                                                                      |
| <b>Kitzman et al</b> (52)   | 2017 | Observational cohort  | Stroke                                                 | B.2.3                                | USA                 | High income                           | 41,4                     | An assessment of the effectiveness of using specifically trained community health workers to support community transitions for individuals with neurological conditions (strokes) and their caregivers.                                   |
| <b>Ku &amp; Kegels</b> (53) | 2014 | Observational cohort  | Diabetes Type 2                                        | B.8.1.2                              | Philippines         | Lower middle income                   | 44,4                     | Context-adapted diabetes self-management education and support given by trained pre-existing local government healthcare personnel                                                                                                        |
| <b>Lakhan</b> (54)          | 2014 | Case-Control          | Intellectual impairments - Behavioural problems        | B.6.9                                | India               | Lower middle income                   | 37,8                     | Non-Government Organisation (NGO)-implemented interventions for behavioural problems in a clinical or a community setting                                                                                                                 |
| <b>Lee et al</b> (55)       | 2016 | Mixed-Methods         | Diabetes Type 2                                        | B.8.1.2                              | USA                 | High income                           | 41,4                     | Two- year pilot intervention of undergraduate volunteers as Patient Partners (assisting during classes, weekly patient calls and accompanying patients to clinic appointments) to foster diabetes self-management education participation |

| Authors            | Year | Methodological design | Disease Profile        | Global Health Data Exchange Grouping | Geographic Location | World Bank Income Group in study year | GINI index (most recent) | Brief rehabilitation intervention description                                                                                                                                                                                               |
|--------------------|------|-----------------------|------------------------|--------------------------------------|---------------------|---------------------------------------|--------------------------|---------------------------------------------------------------------------------------------------------------------------------------------------------------------------------------------------------------------------------------------|
| Lindley et al (56) | 2017 | RCT                   | Stroke                 | B.2.3                                | India               | Lower middle income                   | 37,8                     | Stroke survivors, with residual disability and an informal family-nominated caregiver, received structured rehabilitation training - including information provision, joint goal setting, carer training, and task-specific training        |
| Luyten et al (57)  | 2016 | Observational cohort  | Cleft (lip and) palate | B.12.1.3                             | Uganda              | Low income                            | 42,8                     | Short, intensive speech therapy focussed on phonetic placement and contrasts between oral and nasal airflow and resonance, in Ugandan patients with cleft (lip and) palate                                                                  |
| Muchiri et al (58) | 2016 | RCT                   | Diabetes Type 2        | B.8.1.2                              | South Africa        | Upper middle income                   | 63                       | One year RCT including a nutrition education programme including education materials and participation in eight weekly (2–2.5 h) group nutrition education sessions and follow-up sessions to affect clinical status and dietary behaviours |
| Muchiri et al (60) | 2016 | RCT                   |                        |                                      |                     |                                       |                          |                                                                                                                                                                                                                                             |

| Authors                          | Year | Methodological design | Disease Profile           | Global Health Data Exchange Grouping | Geographic Location | World Bank Income Group in study year | GINI index (most recent) | Brief rehabilitation intervention description                                                                                                                                                                         |
|----------------------------------|------|-----------------------|---------------------------|--------------------------------------|---------------------|---------------------------------------|--------------------------|-----------------------------------------------------------------------------------------------------------------------------------------------------------------------------------------------------------------------|
| <b>Muchiri et al</b> (59)        | 2016 | Qualitative           |                           |                                      |                     |                                       |                          | Subject's experiences of a one year RCT including a nutrition education programme including education materials and participation in eight weekly (2–2.5hr) group nutrition education sessions and follow-up sessions |
| <b>Onagbiye et al</b> (61)       | 2016 | Observational cohort  | Non-communicable diseases | B                                    | South Africa        | Upper middle income                   | 63                       | Exercise intervention (3 days a week for 4 weeks) for managing noncommunicable diseases in an African community                                                                                                       |
| <b>Paddick et al</b> (62)        | 2017 | RCT                   | Dementia                  | B.5.1                                | Tanzania            | Low income                            | 40,5                     | Cognitive stimulation therapy led by occupational therapists, 14 sessions, twice weekly, over seven weeks, for dementia                                                                                               |
| <b>Pandian et al</b> (63)        | 2015 | RCT                   | Stroke                    | B.2.3                                | India               | Lower middle income                   | 37,8                     | Structured home-based rehabilitation delivered by trained and protocol-guided family caregivers of stroke patients with residual disability.                                                                          |
| <b>Puckree &amp; Naidoo</b> (64) | 2014 | RCT                   | Stroke                    | B.2.3                                | South Africa        | Upper middle income                   | 63                       | Physiotherapy focused balance and stability exercise program to improve stability and balance in patients after acute stroke.                                                                                         |
| <b>Rispin &amp; Wee</b> (66)     | 2014 | Cross-sectional study | Persons with disabilities | No category                          | Kenya               | Lower middle income                   | 40,8                     | Outcomes study comparing two paediatric wheelchairs for low-resource setting                                                                                                                                          |

| <b>Authors</b>                   | <b>Year</b> | <b>Methodological design</b> | <b>Disease Profile</b>    | <b>Global Health Data Exchange Grouping</b> | <b>Geographic Location</b> | <b>World Bank Income Group in study year</b> | <b>GINI index (most recent)</b> | <b>Brief rehabilitation intervention description</b>                                                                                                                                                                                                                                          |
|----------------------------------|-------------|------------------------------|---------------------------|---------------------------------------------|----------------------------|----------------------------------------------|---------------------------------|-----------------------------------------------------------------------------------------------------------------------------------------------------------------------------------------------------------------------------------------------------------------------------------------------|
| <b>Rispin &amp; Wee (65)</b>     | 2015        | Cross-sectional study        | Persons with disabilities | No category                                 | Kenya                      | Lower middle income                          | 40,8                            | Comparison (using skills tests) between performances of three types of manual wheelchairs often distributed in low-resource settings                                                                                                                                                          |
| <b>Sarfo et al (67)</b>          | 2018        | Observational cohort         | Stroke                    | B.2.3                                       | Ghana                      | Lower middle income                          | 43,5                            | Tele-rehab intervention (Smartphone with the 9zest Stroke App®), to deliver individualised, goal-targeted, 5 days-a-week exercise program that was remotely supervised by a tele-therapist for 12 weeks, in stroke patients                                                                   |
| <b>Seshan &amp; Muliira (68)</b> | 2015        | Case-Control                 | Urinary incontinence      | B.12.3.7                                    | India                      | Lower middle income                          | 37,8                            | Video-Assisted Teaching for Kegel's Exercises for urinary incontinence.                                                                                                                                                                                                                       |
| <b>Spencer et al (69)</b>        | 2018        | RCT                          | Diabetes Type 2           | B.8.1.2                                     | USA                        | High income                                  | 41,4                            | A community health worker (CHW)-led, 6-month diabetes self-management education program followed by either 12 months of CHW-delivered monthly telephone outreach or 12 months of weekly group sessions delivered by peer leaders, with telephone outreach to those who were unable to attend. |
| <b>Tongsiri et al (70)</b>       | 2017        | Observational cohort         | Persons with disabilities | No category                                 | Thailand                   | Upper middle income                          | 36,4                            | Home modification programme for persons with physical disabilities                                                                                                                                                                                                                            |



| <b>Authors</b>                      | <b>Year</b> | <b>Methodological design</b> | <b>Disease Profile</b>                                      | <b>Global Health Data Exchange Grouping</b> | <b>Geographic Location</b> | <b>World Bank Income Group in study year</b> | <b>GINI index (most recent)</b> | <b>Brief rehabilitation intervention description</b>                                                                                                                                                                                                                  |
|-------------------------------------|-------------|------------------------------|-------------------------------------------------------------|---------------------------------------------|----------------------------|----------------------------------------------|---------------------------------|-----------------------------------------------------------------------------------------------------------------------------------------------------------------------------------------------------------------------------------------------------------------------|
| <b>Tyson et al (71)</b>             | 2015        | RCT                          | Post-operative pulmonary complications following laparotomy | No category                                 | Malawi                     | Low income                                   | 44,7                            | Routine post-operative care (deep breathing instruction and early ambulation) with incentive spirometry following exploratory laparotomy.                                                                                                                             |
| <b>Verusia et al (72)</b>           | 2015        | Cross-sectional study        | Disability - amputations                                    | No category                                 | South Africa               | Upper middle income                          | 63                              | Experiences of physiotherapy rendered to acute and sub-acute in-patients with lower-limb amputations                                                                                                                                                                  |
| <b>Visser &amp; du Plessis (73)</b> | 2015        | Qualitative                  | Sexual abuse                                                | C.3.2.3                                     | South Africa               | Upper middle income                          | 63                              | 10 weekly sessions including expressive art activities, followed by reflective group discussions for sexually abused adolescent females                                                                                                                               |
| <b>Wang et al (74)</b>              | 2016        | RCT                          | War-related trauma/PTSD                                     | No category                                 | Kosovo                     | Lower middle income                          | 29                              | Bio-psycho-social (10 weekly individual 60-minute sessions of cognitive behavioural therapy, individual 20-min breathing exercise and 90-min group physiotherapy and once-daily multi-vitamins) approach for rehabilitation of traumatised victims of torture and war |
| <b>Washburn et al (75)</b>          | 2014        | Cross-sectional study        | Aging - older adults/physical activity                      | No category                                 | USA                        | High income                                  | 41,4                            | Community-based lay-led physical activity program for older adults                                                                                                                                                                                                    |

| Authors         | Year | Methodological design | Disease Profile | Global Health Data Exchange Grouping | Geographic Location | World Bank Income Group in study year | GINI index (most recent) | Brief rehabilitation intervention description                                                                                                                                                                                                                                                                                  |
|-----------------|------|-----------------------|-----------------|--------------------------------------|---------------------|---------------------------------------|--------------------------|--------------------------------------------------------------------------------------------------------------------------------------------------------------------------------------------------------------------------------------------------------------------------------------------------------------------------------|
| Zhou et al (76) | 2019 | RCT                   | Stroke          | B.2.3                                | China               | Upper middle income                   | 38,5                     | Task-shifting / training-the-trainers model, supported by a custom-designed smartphone application, where stroke patients and caregivers received evidence-based in-hospital education and stroke rehabilitation training, delivered by trained nurses before hospital discharge, and 3 post discharge support telephone calls |
