# Supplementary material for: Unravelling ‘low-resource settings’: a systematic scoping review with qualitative content analysis
Source: PubMed Central journal article supplement — BMJ Glob Health. 2021 Jun 3;6(6):e005190. doi: 10.1136/bmjgh-2021-005190 (PMC8183220; doi:10.1136/bmjgh-2021-005190), 2021-06-03
Supplement: bmjgh-2021-005190supp004.pdf [file bmjgh-2021-005190supp004.pdf]

**410 CODES GROUPED INTO 63 DEFINED CONTENT CATEGORIES**

| Layer    | Category                                         | Definition                                                                                                             | No. of Codes | Codes                                                                                                                                                                                                                                                                                                   | Code frequency             |
|----------|--------------------------------------------------|------------------------------------------------------------------------------------------------------------------------|--------------|---------------------------------------------------------------------------------------------------------------------------------------------------------------------------------------------------------------------------------------------------------------------------------------------------------|----------------------------|
| Academic | Knowledge gaps in published data/information     | The available, published literature has an absence or severe lack of knowledge, certain concepts and specific outcomes | 3            | Absence of published data<br>Long term outcome unclear<br>Uncertainty about impact of intervention                                                                                                                                                                                                      | 21<br>6<br>1               |
| Academic | Limited context-specific data                    | Information, data, analyses etc. specific to the context are lacking, scarce or limited                                | 2            | Development of context-specific rehabilitation required<br>Scarcity of context-specific information                                                                                                                                                                                                     | 8<br>23                    |
| Academic | Participant compensation strategies              | These compensation/reimbursement aspects were published as strategies/considerations in the setting                    | 2            | Compensation for study participation<br>Refreshments are offered                                                                                                                                                                                                                                        | 5<br>4                     |
| Academic | Participant compliance challenges                | Intrinsic factors that may lead to compliance challenges within the study sample                                       | 1            | Lack of compliance - intrinsic                                                                                                                                                                                                                                                                          | 2                          |
| Academic | Participant recruitment and retention challenges | Challenges described with regards to retaining participants in the study                                               | 3            | Difficulty transporting participants<br>Lack of compliance - extrinsic<br>Logistical barriers<br>Unreliable contact details                                                                                                                                                                             | 1<br>2<br>7<br>4           |
| Academic | Participant recruitment and retention strategies | Plans of action designed to achieve recruitment and retention of study participants                                    | 6            | Community awareness activities were arranged<br>Door-to-door recruitment<br>Information about free public community activities was provided<br>Participants transported to study facility<br>Research personnel recruits participants<br>Village wide announcement by village head used for recruitment | 1<br>2<br>1<br>2<br>2<br>1 |
| Academic | Research Funding Challenges                      | Funding challenges pertaining to the research design or ability to obtain/maintain funding for research                | 4            | Funding for travel and research provided by individual fundraising of the research team<br>High cost programmes less inviting for large upscale studies<br>Organisational funds used<br>Research funding challenges                                                                                     | 1<br>1<br>4<br>2           |
| Academic | Setting-specific research design challenges      | The setting creates challenges to "gold standard" methodology                                                          | 7            | Adverse ground realities<br>Ground reality<br>Oral consent due to low literacy                                                                                                                                                                                                                          | 1<br>1<br>1                |

|           |                                                       |                                                                                                                                            |    |                                                                     |    |
|-----------|-------------------------------------------------------|--------------------------------------------------------------------------------------------------------------------------------------------|----|---------------------------------------------------------------------|----|
|           |                                                       |                                                                                                                                            |    | Randomization not possible - ethical constraint                     | 1  |
|           |                                                       |                                                                                                                                            |    | Randomization not possible - geographical constraint                | 2  |
|           |                                                       |                                                                                                                                            |    | Restricted array of outcome measures                                | 1  |
|           |                                                       |                                                                                                                                            |    | Social factors                                                      | 1  |
| Academic  | Setting-specific research design used                 | The research design/methodology incorporated an approach tailored to the setting because the setting's specific status required it         | 13 | Adverse ground realities                                            | 1  |
|           |                                                       |                                                                                                                                            |    | Consent and assent read to participants                             | 1  |
|           |                                                       |                                                                                                                                            |    | Culturally appropriate approach used                                | 20 |
|           |                                                       |                                                                                                                                            |    | Help from philanthropic organisation                                | 1  |
|           |                                                       |                                                                                                                                            |    | Oral consent is the standard for research                           | 1  |
|           |                                                       |                                                                                                                                            |    | Patients received a smartphone                                      | 1  |
|           |                                                       |                                                                                                                                            |    | Real-world care                                                     | 1  |
|           |                                                       |                                                                                                                                            |    | Sensitivity to differences between environments                     | 1  |
|           |                                                       |                                                                                                                                            |    | Therapy adapted to suit the setting                                 | 2  |
|           |                                                       |                                                                                                                                            |    | Use of easy-to-use outcome measures                                 | 1  |
|           |                                                       |                                                                                                                                            |    | Use of local language                                               | 26 |
|           |                                                       |                                                                                                                                            |    | Use of simple materials                                             | 11 |
|           |                                                       |                                                                                                                                            |    | Village wide announcement by village head used for recruitment      | 1  |
| Community | Challenges with internet/mobile access                | Access to internet/mobile connectivity is limited, lacking or unavailable due to cost, lack of necessary infrastructure or devices         | 7  | High cost of internet connections                                   | 1  |
|           |                                                       |                                                                                                                                            |    | Internet access dependent on mobile connectivity                    | 1  |
|           |                                                       |                                                                                                                                            |    | Internet access is problematic                                      | 1  |
|           |                                                       |                                                                                                                                            |    | Lack of mobile connectivity                                         | 1  |
|           |                                                       |                                                                                                                                            |    | Limited internet resources                                          | 1  |
|           |                                                       |                                                                                                                                            |    | Most internet usage is via mobile networks                          | 1  |
|           |                                                       |                                                                                                                                            |    | Poor internet quality                                               | 2  |
| Community | Cultural Influences                                   | Cultures, traditions and beliefs influence a community's practices, experiences and expectations                                           | 7  | Cultural and social views of disability                             | 2  |
|           |                                                       |                                                                                                                                            |    | Cultural barriers                                                   | 1  |
|           |                                                       |                                                                                                                                            |    | Cultures and beliefs                                                | 3  |
|           |                                                       |                                                                                                                                            |    | Girls marry before the age of 18                                    | 1  |
|           |                                                       |                                                                                                                                            |    | Misinformation                                                      | 1  |
|           |                                                       |                                                                                                                                            |    | Traditional medicine is used                                        | 4  |
|           |                                                       |                                                                                                                                            |    | Unique cultural characteristics                                     | 1  |
| Community | Difficulties in obtaining and/or retaining employment | Employment opportunities are lacking, limited and difficult to maintain for able-bodied and disabled citizens within the community setting | 8  | Employment opportunities are decreased for people with disabilities | 1  |
|           |                                                       |                                                                                                                                            |    | High unemployment rates                                             | 6  |
|           |                                                       |                                                                                                                                            |    | Inaccessibility and inflexibility of the work and workplace         | 1  |

|           |                                   |                                                                                              |    |                                                                                                                                                                                                                                                                                                                                                                |                                                           |
|-----------|-----------------------------------|----------------------------------------------------------------------------------------------|----|----------------------------------------------------------------------------------------------------------------------------------------------------------------------------------------------------------------------------------------------------------------------------------------------------------------------------------------------------------------|-----------------------------------------------------------|
|           |                                   |                                                                                              |    | Lack of access to income-generating programs<br>Lack of access to vocational skills<br>Lack of adequate employment/self-employment programmes<br>Lack of disability-adjusted employment<br>Struggles in finding adequate employment                                                                                                                            | 1<br>1<br>1<br>1<br>1                                     |
| Community | Disease burden                    | Impact of a health problem on a given population                                             | 1  | High disease burden: Community                                                                                                                                                                                                                                                                                                                                 | 3                                                         |
| Community | Environmental challenges          | Challenges created by the natural world and/or the impact of human activity on its condition | 13 | Environmental barriers<br>Environmental factors<br>Environmental problems<br>Exposure to air pollution<br>Marginalised areas<br>Non-highly urbanised<br>Physical and ecology dynamics/contexts differ<br>Reluctance of patients to travel to research or health facility<br>Rural area<br>Semi-urban area<br>Travel time to facility<br>Urban area<br>Villages | 1<br>2<br>1<br>1<br>1<br>1<br>1<br>26<br>1<br>2<br>5<br>6 |
| Community | Geographical challenges           | Challenges created by the physical features/aspects of an area                               | 9  | Geographic proximity to facility is a barrier to engaging in activity<br>Geographical adversities<br>Geographical isolation<br>Natural disasters<br>Remote area<br>Technological battery life and durability affected by setting<br>Transport/travel over rough terrain<br>Travel distance to service provider<br>Tropical environments                        | 2<br>4<br>1<br>1<br>10<br>1<br>5<br>5<br>1                |
| Community | Increasing internet/mobile access | Emerging use of/access to internet/mobile connectivity                                       | 4  | Access to mobile phone<br>Emerging use of mobile technologies<br>Internet access increasing<br>Use of computers increasing                                                                                                                                                                                                                                     | 5<br>4<br>1<br>1                                          |
| Community | Indigenous community structures   | Native structure of certain communities                                                      | 4  | Indigenous population<br>Non-tribal groups                                                                                                                                                                                                                                                                                                                     | 1<br>1                                                    |

|           |                                    |                                                                                                                                                                                               |    |                                                   |   |
|-----------|------------------------------------|-----------------------------------------------------------------------------------------------------------------------------------------------------------------------------------------------|----|---------------------------------------------------|---|
|           |                                    |                                                                                                                                                                                               |    | Specific ethnic populations                       | 8 |
|           |                                    |                                                                                                                                                                                               |    | Tribal groups                                     | 1 |
| Community | Inequality in community structures | Inter-communal inequality where categories of people are attributed an unequal status in relation to other categories of people – extended by inequality in rights, decisions and opportunity | 19 | Community dwelling residents/participants         | 3 |
|           |                                    |                                                                                                                                                                                               |    | Demographic transition                            | 2 |
|           |                                    |                                                                                                                                                                                               |    | Different pathologies to Western World            | 2 |
|           |                                    |                                                                                                                                                                                               |    | Different socio-economic status to Western World  | 1 |
|           |                                    |                                                                                                                                                                                               |    | Disadvantaged patients                            | 1 |
|           |                                    |                                                                                                                                                                                               |    | Epidemiological transition                        | 1 |
|           |                                    |                                                                                                                                                                                               |    | High-risk populations                             | 1 |
|           |                                    |                                                                                                                                                                                               |    | Lack of disability-adapted curriculums            | 2 |
|           |                                    |                                                                                                                                                                                               |    | Low- to middle-class                              | 1 |
|           |                                    |                                                                                                                                                                                               |    | Low-income populations                            | 1 |
|           |                                    |                                                                                                                                                                                               |    | Many emergency surgeries                          | 1 |
|           |                                    |                                                                                                                                                                                               |    | Medically vulnerable populations                  | 1 |
|           |                                    |                                                                                                                                                                                               |    | Nutritional transition                            | 1 |
|           |                                    |                                                                                                                                                                                               |    | Overpopulation                                    | 1 |
|           |                                    |                                                                                                                                                                                               |    | Poorer socio-economic conditions for the disabled | 1 |
|           |                                    |                                                                                                                                                                                               |    | Social inequality                                 | 1 |
|           |                                    |                                                                                                                                                                                               |    | Sociodemographic barriers                         | 1 |
|           |                                    |                                                                                                                                                                                               |    | Transitional society                              | 1 |
|           |                                    |                                                                                                                                                                                               |    | Underserved areas                                 | 6 |
| Community | Lack of basic services             | The lack of infrastructure and resources hinders the community's access to education, health care, water, sanitation, housing and other basic amenities                                       | 19 | Dirt limited technological use                    | 1 |
|           |                                    |                                                                                                                                                                                               |    | Informal housing                                  | 1 |
|           |                                    |                                                                                                                                                                                               |    | Lack of a safe environment                        | 1 |
|           |                                    |                                                                                                                                                                                               |    | Lack of access to a toilet                        | 1 |
|           |                                    |                                                                                                                                                                                               |    | Lack of connection to electrical grid             | 1 |
|           |                                    |                                                                                                                                                                                               |    | Lack of reliable electricity                      | 1 |
|           |                                    |                                                                                                                                                                                               |    | Lack of safely piped drinking water               | 1 |
|           |                                    |                                                                                                                                                                                               |    | Limited transportation                            | 1 |
|           |                                    |                                                                                                                                                                                               |    | Living in unhygienic conditions                   | 1 |
|           |                                    |                                                                                                                                                                                               |    | Low-cost housing scheme                           | 1 |
|           |                                    |                                                                                                                                                                                               |    | Need for adapted transport                        | 2 |
|           |                                    |                                                                                                                                                                                               |    | Not able to exercise alone                        | 1 |
|           |                                    |                                                                                                                                                                                               |    | Outdoors                                          | 1 |
|           |                                    |                                                                                                                                                                                               |    | Physical barriers                                 | 3 |
|           |                                    |                                                                                                                                                                                               |    | Poor or non-existent roads                        | 1 |
|           |                                    |                                                                                                                                                                                               |    | Single-room dwellings                             | 1 |

|               |                                                                                        |                                                                                                                   |    |                                                   |    |
|---------------|----------------------------------------------------------------------------------------|-------------------------------------------------------------------------------------------------------------------|----|---------------------------------------------------|----|
|               |                                                                                        |                                                                                                                   |    | Township                                          | 1  |
|               |                                                                                        |                                                                                                                   |    | Travel done on foot                               | 1  |
|               |                                                                                        |                                                                                                                   |    | Unpaved surfaces                                  | 1  |
| Community     | Low education levels<br>Basic education needs are not met within the community/setting | Basic education needs are not met within the community/setting                                                    | 7  | Basic education challenges                        | 1  |
|               |                                                                                        |                                                                                                                   |    | Education options are limited                     | 1  |
|               |                                                                                        |                                                                                                                   |    | Educational problems                              | 1  |
|               |                                                                                        |                                                                                                                   |    | Lack of access to education                       | 1  |
|               |                                                                                        |                                                                                                                   |    | Lack of disability-adapted curriculums            | 2  |
|               |                                                                                        |                                                                                                                   |    | Lack of education                                 | 6  |
|               |                                                                                        |                                                                                                                   |    | Low education levels                              | 6  |
| Community     | Minority groups                                                                        | Groups of people who, because of their physical or cultural characteristics, are observed or treated as different | 1  | Racial/ethnic minority                            | 3  |
| Community     | Socio-economically disadvantaged                                                       | Intra-communal background of poverty and limited opportunity                                                      | 18 | Contexts of high inequality                       | 1  |
|               |                                                                                        |                                                                                                                   |    | Economic problems                                 | 2  |
|               |                                                                                        |                                                                                                                   |    | Economically challenged                           | 1  |
|               |                                                                                        |                                                                                                                   |    | Economically distressed                           | 1  |
|               |                                                                                        |                                                                                                                   |    | Limited access to health insurance                | 3  |
|               |                                                                                        |                                                                                                                   |    | Low economic development                          | 1  |
|               |                                                                                        |                                                                                                                   |    | Low socio-economic status                         | 5  |
|               |                                                                                        |                                                                                                                   |    | Medically vulnerable populations                  | 1  |
|               |                                                                                        |                                                                                                                   |    | Poor social backgrounds                           | 1  |
|               |                                                                                        |                                                                                                                   |    | Poorer socio-economic conditions for the disabled | 1  |
|               |                                                                                        |                                                                                                                   |    | Poverty                                           | 14 |
|               |                                                                                        |                                                                                                                   |    | Resource-poor populations fare worse than others  | 1  |
|               |                                                                                        |                                                                                                                   |    | Social factors                                    | 1  |
|               |                                                                                        |                                                                                                                   |    | Social problems                                   | 2  |
|               |                                                                                        |                                                                                                                   |    | Socio-economic barriers                           | 2  |
|               |                                                                                        |                                                                                                                   |    | Socio-economic status                             | 1  |
|               |                                                                                        |                                                                                                                   |    | Socioeconomically disadvantaged                   | 1  |
|               |                                                                                        |                                                                                                                   |    | Uninsured patients                                | 5  |
| Interpersonal | Discrimination and stigma                                                              | When people are seen or treated differently/negatively because of their underlying conditions                     | 5  | Discrimination against disability                 | 3  |
|               |                                                                                        |                                                                                                                   |    | Disease-related stigma                            | 10 |
|               |                                                                                        |                                                                                                                   |    | Isolated from others                              | 3  |
|               |                                                                                        |                                                                                                                   |    | Public transport is problematic                   | 1  |
|               |                                                                                        |                                                                                                                   |    | Resort to alternative forms of treatment          | 1  |

|               |                                                              |                                                                                                                         |    |                                                                                                                                                                                                                                                                                                                                      |                                           |
|---------------|--------------------------------------------------------------|-------------------------------------------------------------------------------------------------------------------------|----|--------------------------------------------------------------------------------------------------------------------------------------------------------------------------------------------------------------------------------------------------------------------------------------------------------------------------------------|-------------------------------------------|
| Interpersonal | Insufficient social support                                  | The patient's social network does not offer sufficient support to help them manage their condition                      | 4  | Defining/understanding social dynamics<br>High strain on patient support system<br>Insufficient social support /understanding<br>Participation is time consuming for support persons                                                                                                                                                 | 2<br>1<br>9<br>1                          |
| Interpersonal | Lack of family involvement                                   | Family unable/unwilling to support/ be involved in patient's pathology due to logistical, financial or personal reasons | 3  | Family discouragement<br>Lack of family assistance because they work to earn a living<br>Time constraints                                                                                                                                                                                                                            | 1<br>1<br>7                               |
| Interpersonal | Lack of resources for caregivers                             | Caregivers lack resources (financial & educational) to be able to fulfil their duties                                   | 2  | Lack of caregiver support - financial<br>Lack of caregiver support - tools or skills                                                                                                                                                                                                                                                 | 1<br>3                                    |
| Interpersonal | Language barriers                                            | Language and communication barriers are created due to a lack of education/exposure                                     | 3  | Language barriers between professionals and patients/participants<br>No therapists available who speak the mother tongue of the patients<br>Patients were encouraged by the use of lay language                                                                                                                                      | 2<br>1<br>2                               |
| Interpersonal | Negative effects on caregiver well-being                     | Caregiver's responsibilities have negative effects on their health and well-being                                       | 3  | Caregiver health affected<br>High strain on patient support system<br>Lack of caregiver support - emotional/psychological                                                                                                                                                                                                            | 1<br>1<br>3                               |
| Interpersonal | Sufficient social support                                    | The patient's social network offers sufficient support to help them manage their condition                              | 2  | Defining/understanding social dynamics<br>Sufficient social support                                                                                                                                                                                                                                                                  | 2<br>3                                    |
| National      | Demographic transition                                       | Changes in an area's patterns of mortality, fertility and growth rates (can be in opposite directions)                  | 5  | Demographic transition<br>Developing world<br>Least-developed<br>Non-Western settings<br>Socio-economic meltdown                                                                                                                                                                                                                     | 2<br>10<br>1<br>2<br>1                    |
| National      | Dependency on government involvement in healthcare provision | Government's (mainly financial) role in healthcare provision is pivotal in meeting the needs of a nation                | 13 | Facilities are state funded<br>Government subsidies used<br>Lack of funding at local and national level<br>Limitations of service delivery<br>Little financial support from the government<br>Need local stakeholder engagement<br>No disability grants<br>Organisations not well-equipped<br>Patients rely on subsidised healthcare | 2<br>1<br>1<br>1<br>1<br>3<br>1<br>1<br>1 |

|          |                                                 |                                                                                                                                                                  |   |                                                                                                                                                                                                                                                                                                                                                                                        |                                           |
|----------|-------------------------------------------------|------------------------------------------------------------------------------------------------------------------------------------------------------------------|---|----------------------------------------------------------------------------------------------------------------------------------------------------------------------------------------------------------------------------------------------------------------------------------------------------------------------------------------------------------------------------------------|-------------------------------------------|
|          |                                                 |                                                                                                                                                                  |   | Population relies on age or disability grants<br>Population relies on healthcare provided by the state<br>Regulation enforcement is weak<br>Research conducted by governmental organisation                                                                                                                                                                                            | 3<br>1<br>1<br>1                          |
| National | Disease burden                                  | Impact of a health problem on a given population                                                                                                                 | 1 | High disease burden: National                                                                                                                                                                                                                                                                                                                                                          | 22                                        |
| National | Economic variability                            | As economies tend to fluctuate, different aspects (income, revenue, supply and demand) introduce a measure of variability within and amongst national economies  | 6 | Catastrophic financial costs<br>Commerce dependent on mobile technologies<br>Global economy more and more driven by technological advance<br>Internet use increasing<br>Poverty<br>Socio-economic meltdown                                                                                                                                                                             | 1<br>1<br>1<br>1<br>14<br>1               |
| National | National healthcare service delivery challenges | Challenges (financial, infrastructural, resources etc.) specified as national obstacles, limitations, problems etc. to service delivery within the health system | 9 | Chronic underfunding of public health system<br>Health infrastructure challenges<br>Healthcare related problems<br>Inequities in the health sector<br>Lack of institutions for specific needs/disabilities<br>Limitations of service delivery<br>Paucity of adequate healthcare infrastructure<br>Significant challenges to provision of assistive technology<br>Very real limitations | 1<br>1<br>1<br>1<br>1<br>1<br>6<br>1<br>1 |
| National | NGO involvement is necessary                    | NGO involvement is needed to assist with funding for research and programme implementation                                                                       | 4 | Implementation through non-profit organisations and settings<br>Need local stakeholder engagement<br>Reliance on donor funding<br>Research conducted by non-governmental organisation                                                                                                                                                                                                  | 5<br>3<br>4<br>3                          |
| National | Political instability                           | Government instability or collapse due to conflicts or competition between political adversaries                                                                 | 4 | Disenfranchised populations<br>Ethnic conflict<br>Post conflict regions<br>Socio-political adversities                                                                                                                                                                                                                                                                                 | 1<br>1<br>3<br>5                          |
| National | World bank income group                         | Countries/nations grouped by income group                                                                                                                        | 4 | Low- and middle-income countries<br>Low-income country<br>Low-income setting<br>Upper middle-income country                                                                                                                                                                                                                                                                            | 11<br>4<br>3<br>1                         |

|                                                     |                                    |                                                                                                |    |                                                                     |   |
|-----------------------------------------------------|------------------------------------|------------------------------------------------------------------------------------------------|----|---------------------------------------------------------------------|---|
| Healthcare Organisational                           | Access barriers                    | Accessibility of certain services are restricted                                               | 22 | Access services on inconsistent basis                               | 1 |
|                                                     |                                    |                                                                                                |    | Accessing available waiver systems is troublesome                   | 1 |
|                                                     |                                    |                                                                                                |    | Availability of rehabilitation is limited for those with disability | 1 |
|                                                     |                                    |                                                                                                |    | Barriers to accessing health services                               | 2 |
|                                                     |                                    |                                                                                                |    | Issues of access to rehabilitation services                         | 3 |
|                                                     |                                    |                                                                                                |    | Lack of access to adequate healthcare                               | 8 |
|                                                     |                                    |                                                                                                |    | Lack of access to material in accessible format                     | 1 |
|                                                     |                                    |                                                                                                |    | Lack of access to specialised support services                      | 5 |
|                                                     |                                    |                                                                                                |    | Limited access to continuous quality care                           | 1 |
|                                                     |                                    |                                                                                                |    | Limited access to conventional drug treatments                      | 1 |
|                                                     |                                    |                                                                                                |    | Limited access to health information and education                  | 3 |
|                                                     |                                    |                                                                                                |    | Limited access to programmes                                        | 3 |
|                                                     |                                    |                                                                                                |    | Little rehabilitation on offer                                      | 1 |
|                                                     |                                    |                                                                                                |    | Logistical barriers                                                 | 7 |
|                                                     |                                    |                                                                                                |    | Need for vocational training to adapt to new circumstance           | 1 |
|                                                     |                                    |                                                                                                |    | Not many outpatient departments in public hospitals                 | 1 |
|                                                     |                                    |                                                                                                |    | Ongoing face-to-face physio rarely available                        | 1 |
| Outreach activities in communities are poor         | 1                                  |                                                                                                |    |                                                                     |   |
| Poor accessibility of services                      | 8                                  |                                                                                                |    |                                                                     |   |
| Rehabilitation implementation is often not feasible | 6                                  |                                                                                                |    |                                                                     |   |
| Rehabilitation services are limited                 | 4                                  |                                                                                                |    |                                                                     |   |
| Specific interventions are rarely available         | 1                                  |                                                                                                |    |                                                                     |   |
| Healthcare Organisational                           | Challenges with assistive devices  | Challenges with obtaining and issuing suitable and appropriate assistive devices               | 5  | Affordable assistive devices are required                           | 3 |
|                                                     |                                    |                                                                                                |    | Assistive devices not suitable                                      | 3 |
|                                                     |                                    |                                                                                                |    | Lack of access to assistive devices                                 | 2 |
|                                                     |                                    |                                                                                                |    | Lack of access to assistive technology                              | 2 |
|                                                     |                                    |                                                                                                |    | Significant challenges to provision of assistive technology         | 1 |
| Healthcare Organisational                           | Challenges with physical resources | Acquiring and maintaining the physical resources to implement healthcare strategies is lacking | 20 | Certain tests not available in local facilities                     | 3 |
|                                                     |                                    |                                                                                                |    | Correct equipment needed                                            | 1 |
|                                                     |                                    |                                                                                                |    | Delays in production of materials                                   | 1 |
|                                                     |                                    |                                                                                                |    | Ensuring privacy                                                    | 2 |
|                                                     |                                    |                                                                                                |    | Equipment barriers                                                  | 1 |



|                           |                      |                                                                                                                                                                                                    |    |                                                                                                                                                                                                                                                                                                                                                                                                                                                                                                                                                                                                                                               |                                                                         |
|---------------------------|----------------------|----------------------------------------------------------------------------------------------------------------------------------------------------------------------------------------------------|----|-----------------------------------------------------------------------------------------------------------------------------------------------------------------------------------------------------------------------------------------------------------------------------------------------------------------------------------------------------------------------------------------------------------------------------------------------------------------------------------------------------------------------------------------------------------------------------------------------------------------------------------------------|-------------------------------------------------------------------------|
|                           |                      |                                                                                                                                                                                                    |    | Frustrations with reliability of equipment<br>Ideal/appropriate assistive device may not be available<br>Investigation/testing equipment was out of order<br>Issues with durability of technology<br>Lack of disability-specific materials<br>Limited access to emergency equipment<br>Materials not in working order<br>Materials were outdated<br>Necessary equipment not available<br>Paucity of adequate healthcare infrastructure<br>Resource availability drives rehabilitation service<br>Scarcity of instructional media<br>Scarcity of resources<br>Technological resources are scarce<br>Technology not available at multiple sites | 1<br>1<br>1<br>1<br>2<br>1<br>1<br>1<br>2<br>6<br>3<br>1<br>3<br>2<br>1 |
| Healthcare Organisational | Communication gaps   | Communication (e.g. health education and information, language use, handover/referral etc.) between and across patients, healthcare providers, healthcare environments and stakeholders is lacking | 10 | Communication across care environments is lacking<br>Health education delivered via radio programs<br>Inconsistent or incomplete documentation<br>Lack of care co-ordination<br>Lack of continuity of care<br>Language barriers between professionals and patients/participants<br>Limited access to health information and education<br>No information provided on their disease type/profile<br>No therapists available who speak the mother tongue of the patients<br>Patients lack skills and knowledge to manage their conditions                                                                                                        | 1<br>1<br>1<br>4<br>2<br>2<br>3<br>1<br>1<br>7                          |
| Healthcare Organisational | Facility limitations | Appropriate and equipped healthcare facilities are non-existent, scarce, lacking or inadequate                                                                                                     | 14 | Finding appropriate public buildings<br>Hybrid model of provision of rehabilitation services<br>Incontinency in facility "equippedness"<br>Lack of appropriate rehabilitation space<br>Lack of facilities<br>No laboratory facilities                                                                                                                                                                                                                                                                                                                                                                                                         | 1<br>1<br>2<br>2<br>5<br>1                                              |

|                           |                                                  |                                                                                                                                                                            |    |                                                                                                                                                                                                                                                                                                                                                                                                                                                                                                             |                                                                    |
|---------------------------|--------------------------------------------------|----------------------------------------------------------------------------------------------------------------------------------------------------------------------------|----|-------------------------------------------------------------------------------------------------------------------------------------------------------------------------------------------------------------------------------------------------------------------------------------------------------------------------------------------------------------------------------------------------------------------------------------------------------------------------------------------------------------|--------------------------------------------------------------------|
|                           |                                                  |                                                                                                                                                                            |    | No private clinics<br>Not attending facilities<br>Paucity of adequate healthcare infrastructure<br>Resource availability drives rehabilitation service<br>Scarcity of resources<br>Structural barriers<br>Sufficient treatment space needed<br>Surgical techniques unavailable                                                                                                                                                                                                                              | 1<br>1<br>6<br>3<br>3<br>1<br>1<br>1                               |
| Healthcare Organisational | Financial constraints                            | Constraints, limitations and gaps with regards to financial affordability of offering an optimal healthcare system                                                         | 14 | Catastrophic financial costs<br>Cost of modern technology is limiting<br>Effective program implementation is costly<br>Finance shortages in healthcare sector<br>Financial barriers<br>Healthcare expenditures are out of pocket<br>High cost of interventions<br>High cost of managing disease<br>Issues with cost of technology<br>Lack of funding to acquire appropriate materials<br>Limited funds<br>Organisational funds used<br>Rehabilitation is not affordable<br>Unaffordable healthcare services | 1<br>1<br>1<br>2<br>2<br>2<br>1<br>8<br>1<br>1<br>1<br>4<br>1<br>6 |
| Healthcare Organisational | Heavy burden of care                             | Burden of care is overwhelming to the available healthcare providers for reasons such as lack of human resource, lack of support, lack of skills, high disease burden etc. | 11 | Areas staffed by few therapists<br>Burden on healthcare providers<br>Catastrophic human costs<br>Compensation eased the burden of study participation<br>Heavy case load<br>High patient-provider ratio<br>Labour intensive<br>Long queues at hospitals<br>Overextended clinicians<br>Reliance on volunteers<br>Time constraints                                                                                                                                                                            | 1<br>6<br>1<br>2<br>2<br>5<br>1<br>1<br>1<br>1<br>7                |
| Healthcare Organisational | Insufficient technological resources and support | Technological resources are difficult to acquire and maintain                                                                                                              | 15 | Cost of modern technology is limiting<br>Frustrations with reliability of equipment<br>Getting technical support in case of equipment is difficult<br>Guidance and support needed in deploying                                                                                                                                                                                                                                                                                                              | 1<br>1<br>2<br>1                                                   |

|                           |                               |                                                                                                     |    |                                                                                                                                                                                                                                                                                                                                                                                                                                                                                                                                                                                                                                                                     |                                                                                       |
|---------------------------|-------------------------------|-----------------------------------------------------------------------------------------------------|----|---------------------------------------------------------------------------------------------------------------------------------------------------------------------------------------------------------------------------------------------------------------------------------------------------------------------------------------------------------------------------------------------------------------------------------------------------------------------------------------------------------------------------------------------------------------------------------------------------------------------------------------------------------------------|---------------------------------------------------------------------------------------|
|                           |                               |                                                                                                     |    | technologies<br>Issues with durability of technology<br>Issues with easy transport of technology<br>Lack of infrastructure to support specialised technologies<br>Lack of technological logistics<br>Need for appropriate rehabilitation technologies<br>Need for low-cost technology solutions<br>Need for rugged, easy-to-use technology<br>Ready supply of spare parts not available<br>Scarcity of resources<br>Technological resources are scarce<br>Technology not available at multiple sites                                                                                                                                                                | 1<br>1<br>1<br>1<br>1<br>1<br>1<br>1<br>1<br>3<br>2<br>1                              |
| Healthcare Organisational | Lack of trained professionals | Shortage of available trained/skilled staff, personnel, human resource etc.                         | 17 | Effective program implementation needs resources<br>Few available therapists<br>Health education delivered by volunteers<br>Human resource limitations<br>Inadequate composition of the healthcare team<br>Informal rehabilitation<br>Lack of human expertise<br>Lack of professional resources<br>Lack resources to deal with growing epidemic<br>Limited access to trained local health care providers<br>Limited supervision available<br>Resource availability drives rehabilitation service<br>Scarcity of resources<br>Shortages in available care management personnel<br>Tapping into unrealized human resources<br>Task shifting<br>Training of volunteers | 1<br>1<br>1<br>2<br>1<br>1<br>1<br>2<br>2<br>17<br>1<br>3<br>3<br>11<br>17<br>11<br>7 |
| Healthcare Organisational | Local healthcare system gaps  | Missing aspects or gaps within the healthcare system leading to failure to administer standard care | 15 | Certain tests not available in local facilities<br>Health system gaps<br>Healthcare often delivered through "safety-net" organisations<br>Implementation gaps                                                                                                                                                                                                                                                                                                                                                                                                                                                                                                       | 3<br>1<br>1                                                                           |

|                           |                                              |                                                                                                                                |    |                                                                                                                                                                                                                                                                                                                                                                                                                                                        |                                                          |
|---------------------------|----------------------------------------------|--------------------------------------------------------------------------------------------------------------------------------|----|--------------------------------------------------------------------------------------------------------------------------------------------------------------------------------------------------------------------------------------------------------------------------------------------------------------------------------------------------------------------------------------------------------------------------------------------------------|----------------------------------------------------------|
|                           |                                              |                                                                                                                                |    | Inadequate follow up<br>Large gap between health and treatment<br>Necessary equipment not available<br>No drug stores/pharmacies<br>No information provided on their disease type/profile<br>No institutional support<br>No laboratory facilities<br>No private clinics<br>Rehabilitation/resources not available outside urban areas<br>Severe disability not catered for<br>Surgical techniques unavailable                                          | 3<br>1<br>1<br>2<br>1<br>1<br>1<br>1<br>1<br>5<br>1<br>1 |
| Healthcare Organisational | Providers lack adequate skills and knowledge | The available healthcare providers lack the necessary knowledge and skills to administer and maintain healthcare strategies    | 6  | Administrators lack skills<br>Attitudinal barriers<br>Healthcare providers lack disease-specific knowledge<br>Healthcare providers lack required skills<br>Limited access to health information and education<br>Surgical techniques unavailable                                                                                                                                                                                                       | 1<br>1<br>7<br>3<br>3<br>1                               |
| Healthcare Organisational | Scheduling considerations                    | Timing and scheduling of healthcare services needs to be considered to ensure adequate treatment time and patient satisfaction | 3  | Adequate treatment time ensures patient satisfaction<br>Time constraints<br>Timing of rehabilitation adjusted to suit the setting                                                                                                                                                                                                                                                                                                                      | 1<br>7<br>2                                              |
| Healthcare Organisational | Suboptimal quality of care                   | Quality of care existing is below standard                                                                                     | 30 | Available interventions are of poor quality<br>Barriers to delivering the gold standard<br>Deterioration of healthcare delivery<br>Difficulties in provision and support of care<br>Dire situation<br>Focus of healthcare sector is an issue<br>Health system failure<br>Health systems are ill-equipped to deliver high-quality services<br>High numbers of undertreated patients<br>Improper medical management<br>Inconsistence of service delivery | 5<br>1<br>2<br>1<br>1<br>1<br>1<br>1<br>1<br>5<br>1      |

|          |                      |                                                                                                         |    |                                                           |   |
|----------|----------------------|---------------------------------------------------------------------------------------------------------|----|-----------------------------------------------------------|---|
|          |                      |                                                                                                         |    | Issues with accessibility of services                     | 1 |
|          |                      |                                                                                                         |    | Issues with compliance of training                        | 1 |
|          |                      |                                                                                                         |    | Lack of protocol driven care                              | 2 |
|          |                      |                                                                                                         |    | Lack resources to deal with growing epidemic              | 2 |
|          |                      |                                                                                                         |    | Limited access to continuous quality care                 | 1 |
|          |                      |                                                                                                         |    | Limited services offered to outpatients                   | 1 |
|          |                      |                                                                                                         |    | Little rehabilitation on offer                            | 1 |
|          |                      |                                                                                                         |    | Malpractice                                               | 1 |
|          |                      |                                                                                                         |    | Misinformation                                            | 1 |
|          |                      |                                                                                                         |    | Most effective service delivery model not identified yet  | 1 |
|          |                      |                                                                                                         |    | Need for vocational training to adapt to new circumstance | 1 |
|          |                      |                                                                                                         |    | Organisations not well-equipped                           | 1 |
|          |                      |                                                                                                         |    | Outreach activities in communities are poor               | 1 |
|          |                      |                                                                                                         |    | Poor satisfaction with services                           | 1 |
|          |                      |                                                                                                         |    | Private, non-profit free clinic                           | 1 |
|          |                      |                                                                                                         |    | Quality primary healthcare challenges                     | 1 |
|          |                      |                                                                                                         |    | Structural barriers                                       | 1 |
|          |                      |                                                                                                         |    | System malfunction                                        | 1 |
|          |                      |                                                                                                         |    | Weak health systems which cannot cope                     | 1 |
| Personal | Access to technology | Technological resource acquisition varies in type and availability                                      | 6  | Access to mobile phone                                    | 5 |
|          |                      |                                                                                                         |    | Computer access was problematic                           | 1 |
|          |                      |                                                                                                         |    | Give participants DVD players                             | 1 |
|          |                      |                                                                                                         |    | Limited access to modern technology                       | 1 |
|          |                      |                                                                                                         |    | Limited prior computer experience                         | 2 |
|          |                      |                                                                                                         |    | Patients received a smartphone                            | 1 |
| Personal | Financial Hardship   | Unavailable, limited, inconsistent etc. access to funds/finances to afford basic amenities and services | 29 | Compensation eased the burden of study participation      | 2 |
|          |                      |                                                                                                         |    | Cost of travel                                            | 5 |
|          |                      |                                                                                                         |    | Discontinuation of medication/treatment                   | 1 |
|          |                      |                                                                                                         |    | Economic barriers                                         | 1 |
|          |                      |                                                                                                         |    | Financial affordability                                   | 2 |
|          |                      |                                                                                                         |    | Financial barriers                                        | 2 |
|          |                      |                                                                                                         |    | Financial challenges                                      | 1 |
|          |                      |                                                                                                         |    | Financial constraints                                     | 3 |
|          |                      |                                                                                                         |    | Financial dependence                                      | 1 |
|          |                      |                                                                                                         |    | Financial problems                                        | 1 |
|          |                      |                                                                                                         |    | Hardship in affording medications                         | 1 |

|          |                                         |                                                                                                                                                                      |   |                                                                 |    |
|----------|-----------------------------------------|----------------------------------------------------------------------------------------------------------------------------------------------------------------------|---|-----------------------------------------------------------------|----|
|          |                                         |                                                                                                                                                                      |   | Healthcare expenditures are out of pocket                       | 2  |
|          |                                         |                                                                                                                                                                      |   | High cost of internet connections                               | 1  |
|          |                                         |                                                                                                                                                                      |   | Hold public insurance                                           | 1  |
|          |                                         |                                                                                                                                                                      |   | Insufficient funds for healthcare                               | 1  |
|          |                                         |                                                                                                                                                                      |   | Lack of means                                                   | 1  |
|          |                                         |                                                                                                                                                                      |   | Limited access to health insurance                              | 3  |
|          |                                         |                                                                                                                                                                      |   | Limited financial means                                         | 1  |
|          |                                         |                                                                                                                                                                      |   | Low material wealth                                             | 1  |
|          |                                         |                                                                                                                                                                      |   | Low-income patients                                             | 8  |
|          |                                         |                                                                                                                                                                      |   | Medical funds have run out                                      | 1  |
|          |                                         |                                                                                                                                                                      |   | No finances                                                     | 1  |
|          |                                         |                                                                                                                                                                      |   | Obstacles imposed by poverty                                    | 1  |
|          |                                         |                                                                                                                                                                      |   | Poverty                                                         | 14 |
|          |                                         |                                                                                                                                                                      |   | Reliance on family members work to sustain households           | 2  |
|          |                                         |                                                                                                                                                                      |   | Tests were too expensive                                        | 1  |
|          |                                         |                                                                                                                                                                      |   | Trouble sustaining life for themselves and their families       | 1  |
|          |                                         |                                                                                                                                                                      |   | Unaffordable healthcare services                                | 6  |
|          |                                         |                                                                                                                                                                      |   | Uninsured patients                                              | 5  |
| Personal | Grants                                  | Use of government subsidised grants                                                                                                                                  | 1 | Population relies on age or disability grants                   | 3  |
| Personal | Influence of individual characteristics | Each person's unique personality/individual characteristics affects or influences the way in which they approach, perceive or experience their health rehabilitation | 7 | Discontinuation of medication/treatment                         | 1  |
|          |                                         |                                                                                                                                                                      |   | Ensuring privacy                                                | 2  |
|          |                                         |                                                                                                                                                                      |   | Lack of compliance - intrinsic                                  | 2  |
|          |                                         |                                                                                                                                                                      |   | Perceptions of encounters with providers                        | 3  |
|          |                                         |                                                                                                                                                                      |   | Poor satisfaction with services                                 | 1  |
|          |                                         |                                                                                                                                                                      |   | Prefer professional healthcare workers                          | 1  |
|          |                                         |                                                                                                                                                                      |   | Reluctance of patients to travel to research or health facility | 1  |
| Personal | Lack of awareness                       | Lack of knowledge or perception of a situation or fact                                                                                                               | 3 | Lack of awareness                                               | 13 |
|          |                                         |                                                                                                                                                                      |   | Patients lack skills and knowledge to manage their conditions   | 7  |
|          |                                         |                                                                                                                                                                      |   | Poor healthcare-seeking behaviours                              | 3  |
| Personal | Low education levels                    | Below-average level of common knowledge about basic things that people would need to function in daily life (e.g. spelling, reading, writing, maths etc.)            | 7 | Illiteracy                                                      | 7  |
|          |                                         |                                                                                                                                                                      |   | Lack of education                                               | 6  |
|          |                                         |                                                                                                                                                                      |   | Literacy difficulties                                           | 1  |
|          |                                         |                                                                                                                                                                      |   | Low education levels                                            | 6  |
|          |                                         |                                                                                                                                                                      |   | Low literacy                                                    | 12 |

|          |                                           |                                                                                                                                                   |   |                                                                                                                                                                                                                    |                                 |
|----------|-------------------------------------------|---------------------------------------------------------------------------------------------------------------------------------------------------|---|--------------------------------------------------------------------------------------------------------------------------------------------------------------------------------------------------------------------|---------------------------------|
|          |                                           |                                                                                                                                                   |   | Low numeracy rates<br>Oral consent due to low literacy                                                                                                                                                             | 1<br>1                          |
| Personal | Low health literacy                       | A lacking ability to process and understand health information needed to make health decisions                                                    | 1 | Low health-literacy                                                                                                                                                                                                | 3                               |
| Personal | Pathological variance                     | Pathologies and their complications differ between individuals                                                                                    | 5 | Different pathologies to Western World<br>High prevalence of complications<br>Impaired defence against damage<br>Occupational biomechanical factors<br>Physical barriers                                           | 2<br>5<br>1<br>1<br>3           |
| Personal | Psychosocial challenges                   | Challenges to the interrelationship between social factors and personal thoughts, feelings and actions                                            | 4 | Psychological barriers<br>Psychosocial factors<br>Social barriers<br>Social problems                                                                                                                               | 1<br>1<br>2<br>2                |
| Personal | Subsistence/"blue collar" type employment | Employment related to the production of goods which are predominantly for own household use and livelihood or employment related to manual labour | 7 | Earn a living through agriculture<br>Heavy manual lifting/work<br>Households rely on subsistence agriculture<br>Manual labour in demand<br>Occupational biomechanical factors<br>Peasant farming<br>Unable to work | 2<br>2<br>2<br>1<br>1<br>1<br>1 |
| Personal | Time constraints                          | Lack of time limits or controls what you one can do                                                                                               | 1 | Time constraints                                                                                                                                                                                                   | 7                               |
| Personal | Transport issues                          | Issues with obtaining transport for travel from one place to another                                                                              | 3 | Public transport is problematic<br>Reliance on public transport<br>Transport difficulties                                                                                                                          | 1<br>1<br>7                     |
| Personal | Undernutrition                            | Lack of proper nutrition, caused by not having enough food or not eating enough food containing substances necessary for growth and health.       | 3 | Food scarcity<br>Hunger<br>Poor nutritional status                                                                                                                                                                 | 1<br>1<br>1                     |
